# Supplementary material for: Ongoing disruption of RSV epidemiology in children in Switzerland
Source: PubMed Central journal article supplement (PMC11403506; doi:10.1016/j.lanepe.2024.101050), 2024-09-02
Supplement: mmc1.pdf [file mmc1.pdf]

# Supplementary Appendix

## Ongoing disruption of RSV epidemiology in children in Switzerland

Patrick M. Meyer Sauter, Margherita Plebani, Johannes Trück, Noémie Wagner, Philipp K. A. Agyeman on behalf of the RSV EpiCH investigators

### Table of content

|                         |   |
|-------------------------|---|
| RSV EpiCH investigators | 2 |
| Supplementary table 1   | 3 |
| Supplementary table 2   | 4 |
| Supplementary figure 1  | 5 |
| Supplementary figure 2  | 6 |
| Role of funding sources | 7 |
| Acknowledgements        | 7 |

## RSV EpiCH investigators

Patrick M. Meyer Sauteur<sup>a</sup>, Christoph Aebi<sup>b</sup>, Florence Barbey<sup>c</sup>, Christoph Berger<sup>a</sup>, Julia A. Bielicki<sup>d</sup>, Michael Buettcher<sup>e,f,g</sup>, Gaud Catho<sup>b</sup>, Antony Croxatto<sup>i</sup>, Beate Deubzer-Raunhardt<sup>k</sup>, Alexis Dumoulin<sup>h</sup>, Mathias U. Gebauer<sup>l</sup>, Mirjam Grimm<sup>m</sup>, Ulrich Heininger<sup>d</sup>, Christian R. Kahlert<sup>n</sup>, Eva Kellner<sup>o</sup>, Lisa Kottanattu<sup>p</sup>, Jasr Kawkby<sup>o</sup>, Guido F. Laube<sup>q</sup>, Anita Niederer-Loher<sup>n</sup>, Margherita Plebani<sup>r</sup>, Klara M. Posfay-Barbe<sup>s</sup>, Nicole Ritz<sup>e</sup>, Fabian Spigariol<sup>t</sup>, Johannes Trück<sup>u</sup>, Noémie Wagner<sup>s</sup>, Petra Zimmermann<sup>v</sup>, Franziska Zucol<sup>w</sup>, Philipp K. A. Agyeman<sup>b</sup>

<sup>a</sup> Divisions of Infectious Diseases and Hospital Epidemiology, University Children's Hospital Zurich, Zurich, Switzerland

<sup>b</sup> Department of Pediatrics, Inselspital, Bern University Hospital, University of Bern, Switzerland

<sup>c</sup> Pediatric Infectious Diseases, Children's Hospital Aarau, Switzerland

<sup>d</sup> Pediatric Infectious Diseases, University of Basel Children's Hospital, Basel, Switzerland

<sup>e</sup> Paediatric Infectious Diseases, Department of Paediatrics, Children's Hospital of Central Switzerland, Lucerne, Switzerland

<sup>f</sup> Faculty of Health Sciences and Medicine, University of Lucerne, Lucerne, Switzerland

<sup>g</sup> Paediatric Pharmacology and Pharmacometrics Research Center at University Children's Hospital Basel, Basel, Switzerland

<sup>h</sup> Infectious Diseases Division, Central Institute, Valais Hospital, Sion, Switzerland

<sup>i</sup> Microbiologie, ADMED Analyses et Diagnostiques Médicaux, La Chaux-de-Fonds, Switzerland

<sup>k</sup> Kantonsspital Graubünden, Chur, Switzerland

<sup>l</sup> Kinderklinik Wildermeth am Spitalzentrum Biel, Biel-Bienne, Switzerland

<sup>m</sup> Kinderklinik Kantonsspital Mürten, Switzerland

<sup>n</sup> Children's Hospital of Eastern Switzerland, St Gallen, Switzerland

<sup>o</sup> Klinik für Kinder und Jugendliche, Stadtspital Zürich, Switzerland

<sup>p</sup> Institute of Pediatrics of Southern Switzerland, EOC, Bellinzona, Switzerland

<sup>q</sup> Department of Pediatrics, Hospital Baden, Baden, Switzerland

<sup>r</sup> Pediatric Infectious Diseases and Vaccinology Unit, Department Women-Mother-Child, Lausanne University Hospital, Lausanne, Switzerland

<sup>s</sup> Unité d'infectiologie pédiatrique, Service de pédiatrie générale, Département de la femme, de l'enfant et de l'adolescent, HUG, Genève, Switzerland

<sup>t</sup> Pédiatrie, Réseau hospitalier neuchâtelois, Switzerland

<sup>u</sup> Division of Allergy and Immunology, University Children's Hospital Zurich, Zurich Switzerland

<sup>v</sup> Faculty of Science and Medicine, University of Fribourg, Switzerland and Department of Paediatrics, Fribourg Hospital HFR, Fribourg, Switzerland

<sup>w</sup> Paediatric Infectious Diseases, Department of Paediatrics, Cantonal Hospital Winterthur, Switzerland

## Supplementary table 1

| Hospital                                                                                                         | Hospital type                        | Testing strategy                                                                           | Age group tested | Test modality | Sentinella region |
|------------------------------------------------------------------------------------------------------------------|--------------------------------------|--------------------------------------------------------------------------------------------|------------------|---------------|-------------------|
| Geneva University Hospital                                                                                       | Tertiary care hospital               | Inpatient only (targeted)                                                                  | 0-16 years       | PCR, Antigen  | 1                 |
| Lausanne University Hospital                                                                                     | Tertiary care hospital               | Inpatient only (targeted)                                                                  | 0-18 years       | PCR           | 1                 |
| Reseau hospitalier neuchatelois                                                                                  | Regional hospital                    | Inpatient only (targeted)                                                                  | 0-16 years       | PCR           | 1                 |
| Hopital du Valais and Hopital Riviera-Chablais                                                                   | Regional hospital and local hospital | In- and outpatient (targeted)                                                              | 0-16 years       | PCR           | 1                 |
| University Hospital Bern                                                                                         | Tertiary care hospital               | Inpatient only (untargeted)                                                                | 0-16 years       | PCR, Antigen  | 2                 |
| Kinderklinik Wildermeth am Spitalzentrum Biel                                                                    | Regional hospital                    | Inpatient only (untargeted)                                                                | 0-16 years       | PCR           | 2                 |
| Fribourg Hospital HFR                                                                                            | Regional hospital                    | Inpatient only (targeted)                                                                  | 0-16 years       | PCR           | 2                 |
| Cantonal Hospital Aarau                                                                                          | Regional hospital                    | April–September: in- and outpatient (targeted). October–March: inpatient only (untargeted) | 0-18 years       | PCR, Antigen  | 3                 |
| Cantonal Hospital of Baden                                                                                       | Regional hospital                    | In- and outpatient (targeted)                                                              | 0-16 years       | PCR, Antigen  | 3                 |
| University Children’s Hospital Basel                                                                             | Tertiary care hospital               | In- and outpatient (untargeted)                                                            | 0-16 years       | PCR           | 3                 |
| Children’s Hospital of Central Switzerland, Lucerne                                                              | Tertiary care hospital               | Inpatient only (targeted and untargeted)                                                   | 0-16 years       | PCR, Antigen  | 4                 |
| Cantonal Hospital Muensterlingen                                                                                 | Regional hospital                    | Inpatient only (untargeted)                                                                | 0-16 years       | PCR           | 5                 |
| Children’s Hospital of Eastern Switzerland                                                                       | Tertiary care hospital               | Inpatient only (targeted)                                                                  | 0-16 years       | PCR           | 5                 |
| Cantonal hospital of Winterthur                                                                                  | Regional hospital                    | In- and outpatient (targeted)                                                              | 0-16 years       | PCR           | 5                 |
| University Children’s Hospital Zurich                                                                            | Tertiary care hospital               | Inpatient only (untargeted)                                                                | 0-16 years       | PCR           | 5                 |
| Triemli Hospital Zurich                                                                                          | Regional hospital                    | In- and outpatient (targeted)                                                              | 0-16 years       | PCR           | 5                 |
| Cantonal Hospital of Graubunden                                                                                  | Regional hospital                    | Inpatient only (untargeted)                                                                | 0-16 years       | PCR           | 6                 |
| Istituto Pediatrico della Svizzera Italiana (Locarno, Bellinzona, Lugano, Mendrisio), Ente Ospedaliero Cantonale | Regional hospitals                   | Inpatient only, occasionally outpatient (targeted)                                         | 0-16 years       | PCR, Antigen  | 6                 |

Characteristics of hospitals participating in RSVepiCH and their strategy for RSV testing. PCR=polymerase chain reaction; Antigen=RSV rapid antigen test or direct immunofluorescence.

## Supplementary table 2

| Period                    | 0-11 months  | 12-23 months | 2-18 years   |
|---------------------------|--------------|--------------|--------------|
| 2021/2022 pandemic period | 3019 (58.5%) | 1085 (21%)   | 1056 (20.5%) |
| 2022/2023 winter season   | 3223 (61.5%) | 913 (17.4%)  | 1106 (21.1%) |
| 2023/2024 winter season   | 2667 (57.1%) | 868 (18.6%)  | 1136 (24.3%) |

Age distribution of children with RSV in Switzerland, stratified by season. Age distribution varied significantly between the three time periods ( $p < 0.001$  from Pearson  $\chi^2$ -test for all three time periods combined,  $p < 0.001$  for the comparison 2021/2022 pandemic period vs. 2022/2023 winter season,  $p < 0.001$  for the comparison 2021/2022 pandemic period vs 2023/2024 winter season, and  $p < 0.001$  for the comparison 2022/2023 winter season vs 2023/2024 winter season).

## Supplementary figure 1

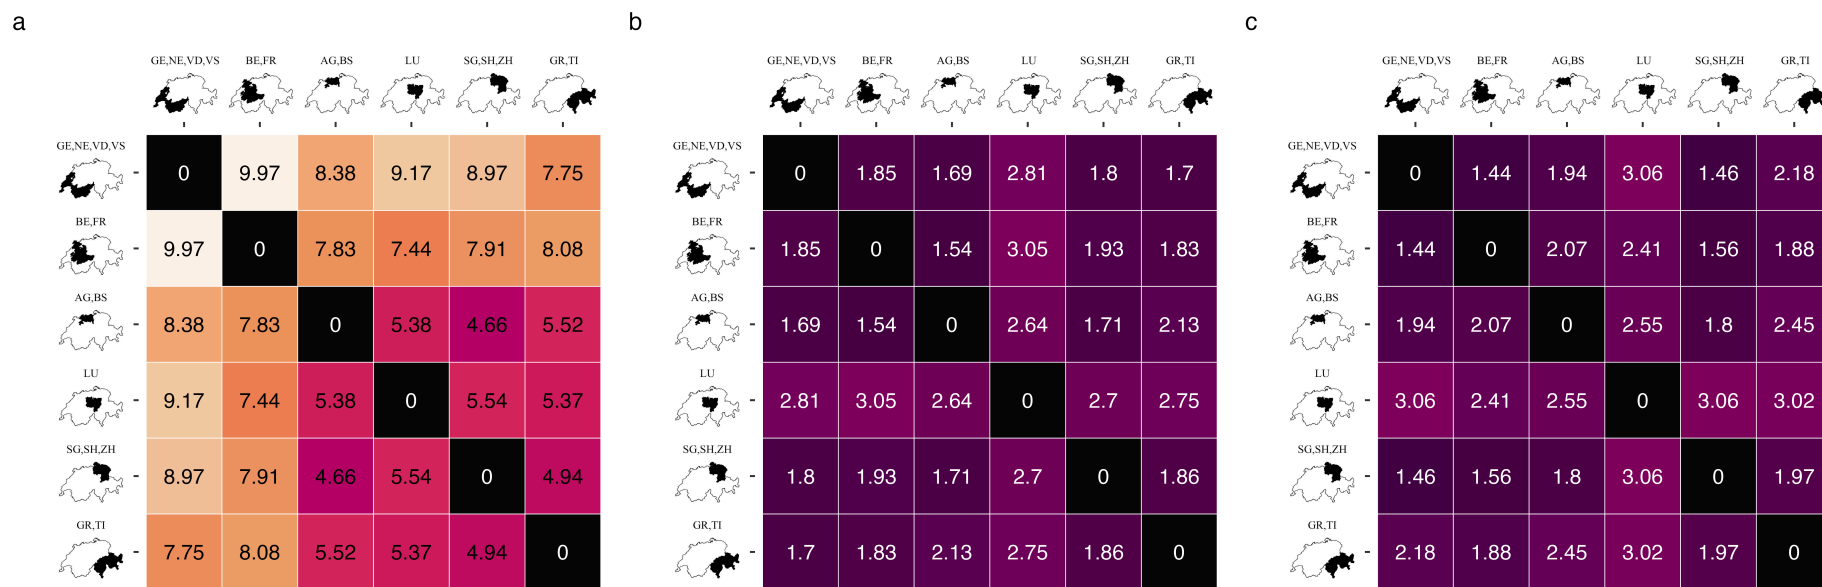

Heatmap of the pairwise similarity of the scaled time series of RSV detection in the 6 respiratory virus reporting regions in Switzerland for (a) the 2021/2022 pandemic period, (b) the 2022/2023 winter season, and (c) the 2023/2024 winter season. Similarity was measured by calculating the “distance” between time series using Dynamic Time Warping algorithm. Distance scores for the comparison of two time series are shown in the respective cell. Higher distance scores (light colours) indicate time series are more dissimilar while lower distance scores (dark colours) indicate time series are more similar. Panel (a) demonstrates that during the 2021/2022 pandemic period scaled time series of RSV detection in the northern, eastern and south-eastern regions of Switzerland clustered closer together compared to the western parts of Switzerland. Panels (b) and (c), in contrast, show RSV detection time series of all 6 regions of Switzerland were more similar during the 2022/2023 and 2023/2024 winter seasons compared to the 2021/2022 pandemic period.

## Supplementary figure 2

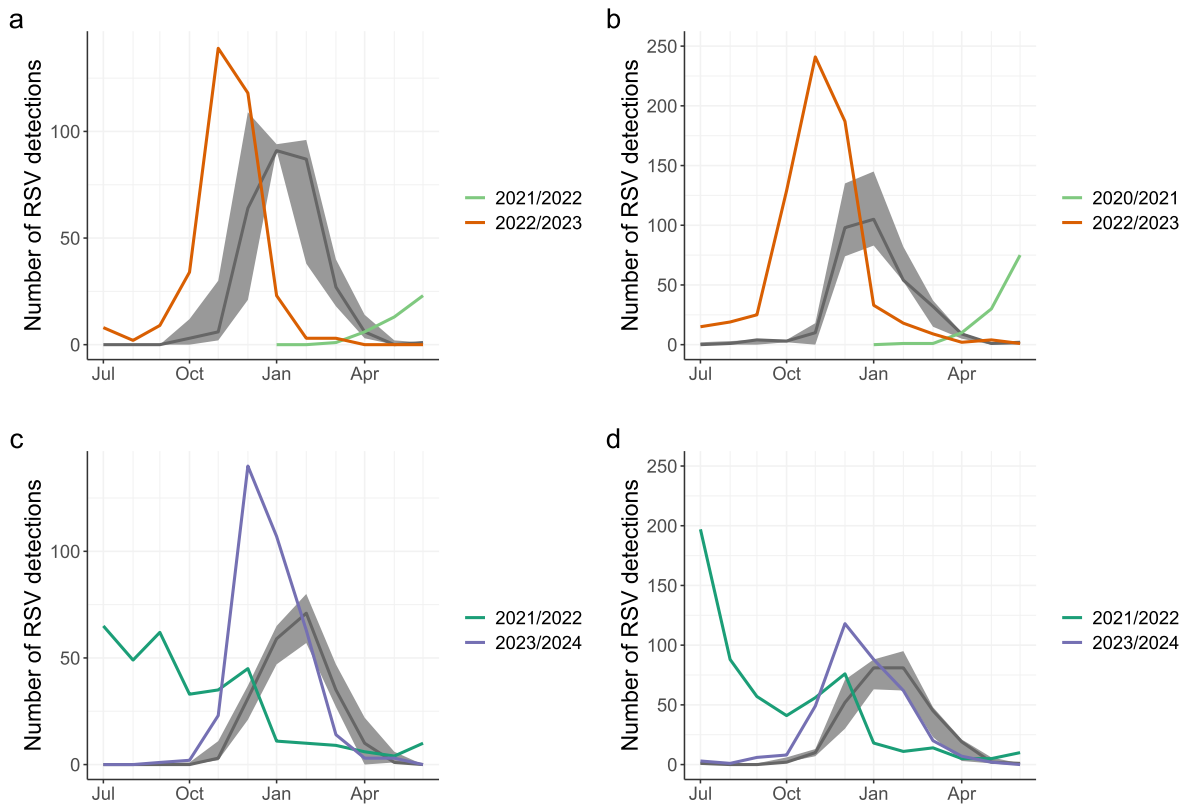

Monthly number of RSV detections in children in the University Hospitals Bern and Zurich by season strength, July 2014 - June 2024.

Data are shown for winter seasons starting in even-numbered years (strong seasons) for Bern (a) and Zurich (b) and winter seasons starting in odd-numbered years (weak seasons) for Bern (c) and Zurich (d) respectively. The light green line denotes the number of RSV detections from 4<sup>th</sup> January 2021 until 4<sup>th</sup> July 2021 (2021/2022 pandemic period), the dark green line from 5<sup>th</sup> July 2021 until 3<sup>rd</sup> July 2022 (2021/2022 pandemic period), the orange line the 2022/2023 winter season, and the violet line the 2023/2024 winter season. Historical data are shown in grey. The dark grey line indicates the median number, the light grey ribbon the minimum and maximum number of RSV detections by month for 2014/2015, 2016/2017, and 2018/2019 (strong seasons) and 2015/2016, 2017/2018, and 2019/2020 (weak seasons).

## **Role of funding sources**

RSV EpiCH is not supported by external funding.

## **Acknowledgements**

The authors would like to acknowledge the help of Valentin von Niederhäusern and Alix L. von Hammerstein with setting up the RSV EpiCH network and its database infrastructure. We also thank M. Hostettler, Fabiola Hadzic, and D. Bandeira for their help with collecting the data.
